# Supplementary material for: Analysis of Potential Genes and Economic Parameters Associated with Growth and Heat Tolerance in Sheep (Ovis aries)
Source: MDPI journal article supplement (doi:10.3390/ani13030353), 2023-01-19
Supplement: s1 [file s1]

## Supplementary Materials

```

LC717976.1      GCTGGGTCTTCATTGCTGTGTTTCAGGCTTTCTCTAGTTGGGGCAAGCGAGGGCTATTCTC 60
B              GCTGGGTCTTCATTGCTGTGTTTCAGGCTTTCTCTAGTTGGGGCAAGCGAGGGCTATTCTC 60
AD             GCTGGGTCTTCATTGCTGTGTTTCAGGCTTTCTCTAGTTGGGGCAAGCGAGGGCTATTCTC 60
*****

LC717976.1      TAGTTGCGATGTGCAGCCTTCTGCAGGTGGCTTCTCTTGTTCAGAGCCGGGGCTCTGGG 120
B              TAGTTGCGATGTGCAGCCTTCTGCAGGTGGCTTCTCTTGTTCAGAGCCGGGGCTCTGGG 120
AD             TAGTTGCGATGTGCAGCCTTCTGCAGGTGGCTTCTCTTGTTCAGAGCCGGGGCTCTGGG 120
*****

LC717976.1      TGCACAGGCTTCAGTTGTTGTGGCTTGAAGCTCTAGAGCACAGGCTCAGTGGTCGTGGCG 180
B              TGCACAGGCTTCAGTTGTTGTGGCTTGAAGCTCTAGAGCACAGGCTCAGTGGTCGTGGCG 180
AD             TGCACAGGCTTCAGTTGTTGTGGCTTGAAGCTCTAGAGCACAGGCTCAGTGGTCGTGGCG 180
*****

LC717976.1      CACAGGCTTACTCCACGGCATGTGGGATCTTCCCTGGCCAGGGAGCGAACCCTGTCCCC 240
B              CACAGGCTTACTCCATGGCATGTGGGATCTTCCCTGGCCAGGGAGCGAACCCTGTCCCC 240
AD             CACAGGCTTACTCCACGGCATGTGGGATCTTCCCTGGCCAGGGAGCGAACCCTGTCCCC 240
*****

LC717976.1      TGC GTT GCAAGGCGGCCTCTTAACCACTGGCCACCAGGGAAGCCCCAAGATGCCAAGGCT 300
B              TGC GTT GCAAGGCGGCCTCTTAACCACTGGCCACCAGGGAAGCCCCAAGATGCCAAGGCT 300
AD             TGC GTT GCAAGGCGGCCTCTTAACCACTGGCCACCAGGGAAGCCCCAAGATGCCAAGGCT 300
*****

LC717976.1      TTTTACTTCTGGTTCTTACCGTCTGGTTAATACAATTCCCTTCATCAGCCAGTCA 354
B              TTTTACTTCTGGTTCTTACCGTCTGGTTAATACAATTCCCTTCATCAGCCAGTCA 354
AD             TTTTACTTCTGGTTCTTACCGTCTGGTTAATACAATTCCCTTCATCAGCCAGTCA 354
*****

```

**Figure S1.** Representative DNA sequence alignment for a segment of CDS of *CAST* gene (354-bp) among Barki and Aboudeleik lambs and reference sequence available in the GenBank gb|LC717976.1|. B= Barki and AD= Aboudeleik. The asterisks represent the similarity.

```

AH014693.2      ACTGGTTTGGACTTCATCCCTGGGCTCCACCCTCTCCTGAGTTTGTCCAAGATGGACCAG 60
B              ACTGGTTTGGACTTCATCCCTGGGCTCCACCCTCTCCTGAGTTTGTCCAAGATGGACCAG 60
AD             ACTGGTTTGGACTTCATCCCTGGGCTCCACCCTCTCCTGAGTTTGTCCAAGATGGACCAG 60
*****

AH014693.2      ACATTGGCAATCTACCAACAGATCCTCGCCAGTCTGCCTTCCAGAAATGTGATCCAAATA 120
B              ACATTGGCGATCTACCAACAGATCCTCGCCAGTCTGCCTTCCAGAAATGTGATCCAAATA 120
AD             ACATTGGCAATCTACCAACAGATCCTCGACAGTCTGCCTTCCAGAAATGTGATCCAAATA 120
*****

AH014693.2      TCTAATGACCTGGAGAACCTCCGGGACCTTCTCCACCTGCTGGCCGCTCCAGAGCTGC 180
B              TCTAATGACCTGGAGAACCTCCGGGACCTTCTCCACCTGCTGGCCGCTCCAGAGCTGC 180
AD             TCTAATGACCTGGAGAACCTCCGGGACCTTCTCCACCTGCTGGCCGCTCCAGAGCTGC 180
*****

AH014693.2      CCCTTGCCGAGGTTCAGGGCCCTGGAGAGCTTGGAGAGCCTGGGCGTCGTCCTGGAAGCC 240
B              CCCTTGCCGAGGTTCAGGGCCCTGGAGAGCTTGGAGAGCCTGGGCGTCGTCCTGGAAGCC 240
AD             CCCTTACCGCAGGTTCAGGGCCCTGGAGAGCTTGGAGAGCCTGGGCGTCGTCCTGGAAGCC 240
*****

AH014693.2      TCCCTCTACTCCACCGAGGTGGTGGCCCTGAGCCGGCTACAGGGGTCTCTACAGGACATG 300
B              TCCCTCTACTCCACCGAGGTGGTGGCCCTGAGCCGGCTACAGGGGTCTCTACAGGACATG 300
AD             TCCCTCTACTCCACCGAGGTGGTGGCCCTGAGCCGGCTACAGGGGTCTCTACAGGACATG 300
*****

AH014693.2      TTGCGGCAGCTGGACCTCAGCCCTGGGTGCTGAAGCCTTGAAGGCCTCTCTTCCCAAAGT 360
B              TTGCGGCAGCTGGACCTCAGCCCTGGGTGCTGAAGCCTTGAAGGCCTCTCTTCCCAAAGT 360
AD             TTGCGGCAGCTGGACCTCAGCCCTGGGTGCTGAAGCCTTGAAGGCCTCTCTTCCCAAAGT 360
****

AH014693.2      CCAGGGAAGAAACCTGAGCTTCTGGCTGTCTGCAGAAGAGAGCCTATGTGGGCATCCTTT 420
B              CCAGGGAAGAAACCTGAGCTTCTGGCTGTCTGCAGAAGAGAGCCTATGTGGGCATCCTTT 420
AD             CCAGGGAAGAAACCTGAGCTTCTGGCTGTCTGCAGAAGAGAGCCTATGTGGGCATCCTTT 420
*****

AH014693.2      ATGCAGGCCAGC      432
B              ATGCAGGCCAGC      432
AD             ATGCAGGCCAGC      432
*****

```

**Figure S2.** Representative DNA sequence alignment for a segment of CDS of *LEP* gene (432-bp) among Barki and Aboudeleik lambs and reference sequence available in the GenBank gb|AH014693.2|. B= Barki and AD= Aboudeleik. The asterisks represent the similarity.

|                |                                                                |     |
|----------------|----------------------------------------------------------------|-----|
| XM_027958720.2 | ATGGGAGCTGTTTCTCCCTCTTGCACTGGAGAGAAGAGTCACGCTGACTGTGTCCCTCATT  | 60  |
| B              | ATGGGAGCTGTTTCTCCCTCTTGCACTGGAGAGAAGAGTCACGCTGACTGTGTCCCTCATT  | 60  |
| AD             | ATGGGAGCTGTTTCTCCCTCTTGCACTGGAGAGAAGAGTCACGATGACTGTGTCCCTCATT  | 60  |
|                | *****                                                          |     |
| XM_027958720.2 | TACAAATCAGAGACCGAGGGGGACAGAGACCACACTCCAGACACGGACTTCCTCGGATTTC  | 120 |
| B              | TACAAATCAGAGACCGAGGGGGACAGAGACCACCGCTCCAGACACGGACTTCCTCGGATTTC | 120 |
| AD             | TACAAATCAGAGACCGAGGGGGACAGAGACCACACTCCAGACACGGACTTCCTCGGATTTC  | 120 |
|                | *****                                                          |     |
| XM_027958720.2 | CCCACCAAGATGCTAACAGTGAAGAGGCTGGGAGGAAGCAACGCGTGTACCGCAGTGAC    | 180 |
| B              | CCCACCAAGATGCTAACAGTGAAGAGGCTGGGAGGAAGCAACGCGTGTACTGCAGTGAC    | 180 |
| AD             | CCCACCAAGATGCTAACAGTGAAGAGGCTGGGAGGAAGCAACGCGTGTACCGCAGTGAC    | 180 |
|                | *****                                                          |     |
| XM_027958720.2 | CAGCTGGAGAAGATGGCCCTTTTCCAGTGCATGGAGGAGGTGGAGAAGTGCTTTCTGGAA   | 240 |
| B              | CAGCTGGAGAAGATGGCCCTTTTCCAGTGCATGGAGGAGGTGGAGAAGTGCTTTCTGGAA   | 240 |
| AD             | CAGCTGGAGAAGATGGCCCTTTTCCAGTGCATGGAGGAGGTGGAGAAGTGCTTTCTGGAA   | 240 |
|                | *****                                                          |     |
| XM_027958720.2 | GAAAGTTCCGCTGAACAAGATTTCAGATCTGGAAAGAACCCAGGCAAGGAGCAAGCGTGG   | 300 |
| B              | GAAAGTTCCGCTGAACAAGATTTCAGATCTGGAAAGAACCCAGGCAAGGAGCAAGCGTGG   | 300 |
| AD             | GAAAGTTCTGGTGAACAAGATTTCAGATCTGGAAAGAACCCAGGCAAGGAGCAAGCGTGG   | 300 |
|                | *****                                                          |     |
| XM_027958720.2 | TCCTCCCTGGCCTGCAGGAGACAGCACCCGCCCGCGGTGAAAGGACAGCGGCCCGCA      | 360 |
| B              | TCCTCCCTGGCCTGCAGGAGACAGCACCCGCCCGCGGTGAAAGGACAGCGGCCCGCA      | 360 |
| AD             | TCCTCCCTGGCCTGCAGGAGACAGCACCCGCCCGCGGTGAAAGGACAGCGGCCCGCA      | 360 |
|                | *****                                                          |     |
| XM_027958720.2 | GCCGACGCCCTGGCACCOCCTGCGCCCTTTGACCACCGCATCGTGACGGCCAGGCA 416   |     |
| B              | GCCGACGCCCTGGCACCOCCTGCGCCCTTTGACCACCGCATCGTGACGGCCAGGCA 416   |     |
| AD             | GCCGACGCCCTGGCACCOCCTGCGCCCTTTGACCACCGCATCGTGACGGCCAGGCA 416   |     |
|                | *****                                                          |     |

**Figure S3.** Representative DNA sequence alignment for a segment of CDS of *MYLK4* gene (416-bp) among Barki and Aboudeleik lambs and reference sequence available in the GenBank gb|XM\_027958720.2|. B= Barki and AD= Aboudeleik. The asterisks represent the similarity.

|                |                                                               |     |
|----------------|---------------------------------------------------------------|-----|
| XM_042249577.1 | GGTAACATTACCAAGCGGAAGTTTCGGGCTGATGAAGAAGGCCTACGAGCTGAGCGTGCT  | 60  |
| B              | GGTAACATTACCAAGCGGAAGTTTCGGGCTGATGAAGAAGGCCTACGAGCTGAGTGCTGCT | 60  |
| AD             | GGTAACATTACCAAGCGGAAGTTTCGGGCTGATGAAGAAGGCCTACGAGCTGAGCGTGCT  | 60  |
|                | *****                                                         |     |
| XM_042249577.1 | CTGCGACTGCGAGATCGCCCTCATCATCTTCAACAGCTCCAACCGCCTCTTCCAGTACGC  | 120 |
| B              | CTGCGACTGCGAGATCGCCCTCATCATCTTCAACAGCTCCAACCGCCTCTTCCAGTACGC  | 120 |
| AD             | CTGCGACTGCGAGATCGCCCTCATCATCTTCAACAGCTCCAACCGCCTCTTCCAGTACGC  | 120 |
|                | *****                                                         |     |
| XM_042249577.1 | CAGCACCGACATGGACCGCGTCTTCTGAAGTACACGGAGTACAGCGAGCCTCAGGAGAG   | 180 |
| B              | CAGCACCGACATGGACCGCGTCTTCTGAAGTACACGGAGTACAGCGAGCCTCAGGAGAG   | 180 |
| AD             | CAGCACCGACATGGACCGCGTCTTCTGAAGTACACAGAGTACAGCGAGCCTCAGGAGAG   | 180 |
|                | *****                                                         |     |
| XM_042249577.1 | CCGCACCAACGCCGACATCCTCGAGACACTGAAGCGGAGGGGTGTGGGCCTTGATGGACC  | 240 |
| B              | CCGCACCAACGCCGACATCCTCGAGACACTGAAGCGGAGGGGTGTGGGCCTTGATGGACC  | 240 |
| AD             | CCGCACCAACGCCGACATCCTCGAGACACTGAAGCGGAGGGGTGTGGGCCTTGATGGACC  | 240 |
|                | *****                                                         |     |
| XM_042249577.1 | CGAGCTGGAGCCAGACGAGGGGCTTGAGGGGCCAGGAGAGAAGCTGCGGAGGCTGGCAGG  | 300 |
| B              | CGAGCTGGAGCCAGACGAGGGGCTTGAGGGGCCAGGAGAGAAGCTGCGGAGGCTGGCAGG  | 300 |
| AD             | CGAGCTGGAGCCAGACGAGGGGCTTGAGGGGCCAGGAGAGAAGCTGCGGAGGCTGGGAGG  | 300 |
|                | *****                                                         |     |
| XM_042249577.1 | TGATGGGGGTGACCCAGCCTTGCCCCGGCCCCGGCTCTATCCCGCAGCCCCACTATGCC   | 360 |
| B              | TGATGGGGGTGACCCAGCCTTGCCCCGGCCCCGGCTCTATCCCGCAGCCCCACTATGCC   | 360 |
| AD             | TGATGGGGGTGACCCAGCCTTGCCCCGGCCCCGGCTCTATCCCGCAGCCCCACTATGCC   | 360 |
|                | *****                                                         |     |
| XM_042249577.1 | CAGCCCAGACATGGTATATGGGGCACTGCCCCCACCAGCCTGTGAACCCACTGGACTTGG  | 420 |
| B              | CAGCCCAGACATGGTATATGGGGCACTGCCCCCACCAGCCTGTGAACCCACTGGACTTGG  | 420 |
| AD             | CAGCCCAGACATGGTATATGGGGCACTGCCCCCACCAGCCTGTGAACCCACTGGACTTGG  | 420 |
|                | *****                                                         |     |
| XM_042249577.1 | GGAG 424                                                      |     |
| B              | GGAG 424                                                      |     |
| AD             | GGAG 424                                                      |     |
|                | ****                                                          |     |

**Figure S4.** Representative DNA sequence alignment for a segment of CDS of *MEF2B* gene (424-bp) among Barki and Aboudeleik lambs and reference sequence available in the GenBank gb|XM\_042249577.1|. B= Barki and AD= Aboudeleik. The asterisks represent the similarity.

|                |                                                                |     |
|----------------|----------------------------------------------------------------|-----|
| NM_001009402.2 | TGGGATGCCATCGACCTGGACAATCCCCAGGAGCCCCGGCCGGAGCGAGCGCCGCGCCCGG  | 60  |
| B              | TGGGATGCCATCGACCTGGACAATCCCCAGGAGCCCCGGCCGGAGCGAGCGCCGCGCCCGG  | 60  |
| AD             | TGGGATGCCATCGACCTGGACAATCCCCAGGAGCCCCGGCCGGAGCGAGCGCCGCGCCCGG  | 60  |
| *****          |                                                                |     |
| NM_001009402.2 | TGCGCGACCGCCCGGCACGACCCAGCCCTCCCTCCTGAACACCCAGCCACGTGCCAGCGG   | 120 |
| B              | TGCGCGACCGCCCGGCACGACCCAGCCCTCCCTCCTGAACACCCAGCCACGTGCCAGCGG   | 120 |
| AD             | TGCGCGACCGCCCGGCACGACCCAGCCCTCCCTCCTGAACACCCAGCCACGTGCCAGCGG   | 120 |
| *****          |                                                                |     |
| NM_001009402.2 | TTGCCGAGCCGTTCAGGGGAAACCTTCGGTGACCCCTAGCTTTGGGCTGGAATATCCCCGCG | 180 |
| B              | TTGCCGAGCCGTTCAGGGGAAACCTTCGGTGACCCCTAGCTTTGGGCTGGAATATCCCCGCG | 180 |
| AD             | TTGCCGAGCCGTTCAGGGGAAACCTTCGGTGACCCCTAGCTTTGGGCTGGAATATCCCCGCG | 180 |
| *****          |                                                                |     |
| NM_001009402.2 | TTCCCGAAGACGGAGACTCGGAGTTCGAAGCAGGGTGAACGGACATGGCGGGCTGGATCC   | 240 |
| B              | TTCCCGAAGACGGAGACTCGGAGTTCGAAGCAGGGTGAACGGACATGGCGGGCTGGATCC   | 240 |
| AD             | TTCCCGAAGACGGAGACTCGGAGTTCGAAGCAGGGTGAACGGACATGGCGGGCTGGATCC   | 240 |
| *****          |                                                                |     |
| NM_001009402.2 | AGGCCAGCAGCTGCAGGGAGATGCCCTGCCCCAGATGCAGGTGCTATACGGGCAGCACT    | 300 |
| B              | AGGCCAGCAGCTGCAGGGAGATGCCCTGCCCCAGATGCAGGTGCTATACGGGCAGCACT    | 300 |
| AD             | AGGCCAGCAGCTGCAGGGAGATGCCCTGCCCCAGATGCAGGTGCTATACGGGCAGCACT    | 300 |
| *****          |                                                                |     |
| NM_001009402.2 | TCCCCATCGAGGTCCGGCATTACTTGGCGCAGTGGATTGAGAGCCAGCCGTGGGATGCCA   | 360 |
| B              | TCCCCATCGAGGTCCGGCATTACTTGGCGCAGTGGATTGAGAGCCAGCCGTGGGATGCCA   | 360 |
| AD             | TCCCCATCGAGGTCCGGCATTACTTGGCGCAGTGGATTGAGAGCCAGCCGTGGGATGCCA   | 360 |
| *****          |                                                                |     |
| NM_001009402.2 | TGACCTGGACAATCCCCAGGACCGGGCCAGGTACCCAGCTCCTGGAGGGCCTGGTGC      | 420 |
| B              | TGACCTGGACAATCCCCAGGACCGGGCCAGGTACCCAGCTCCTGGAGGGCCTGGTGC      | 420 |
| AD             | TGACCTGGACAATCCCCAGGACCGGGCCAGGTACCCAGCTCCTGGAGGGCCTGGTGC      | 420 |
| *****          |                                                                |     |
| NM_001009402.2 | AGGAGTTGCAAAAGAGGCAGAGCACCAGTTCGGGGAAGACGGGTTCTTACTGAGATCA     | 480 |
| B              | AGGAGTTGCAAAAGAGGCAGAGCACCAGTTCGGGGAAGACGGGTTCTTACTGAGATCA     | 480 |
| AD             | AGGAGTTGCAAAAGAGGCAGAGCACCAGTTCGGGGAAGACGGGTTCTTACTGAGATCA     | 480 |
| *****          |                                                                |     |
| NM_001009402.2 | AGCTGGGGCACTACGTCCACGTCAGCTCCAGAACACGTACGACCGCTGCCCATGGAGCT    | 540 |
| B              | AGCTGGGGCACTACGTCCACGTCAGCTCCAGAACACGTACGACCGCTGCCCATGGAGCT    | 540 |
| AD             | AGCTGGGGCACTACGTCCACGTCAGCTCCAGAACACGTACGACCGCTGCCCATGGAGCT    | 540 |
| *****          |                                                                |     |
| NM_001009402.2 | GGTTGCGCTGCATTGCGCACATTCTGTACRAATGAACAGAGGCTGGTCCGAGAAGCCACCA  | 600 |
| B              | GGTTGCGCTGCATTGCGCACATTCTGTACRAATGAACAGAGGCTGGTCCGAGAAGCCACCA  | 600 |
| AD             | GGTTGCGCTGCATTGCGCACATTCTGTACRAATGAACAGAGGCTGGTCCGAGAAGCCACCA  | 600 |
| *****          |                                                                |     |
| NM_001009402.2 | ATGGTAATTCTTCTGCTGGGATCCTGGTTGATGCCATGTCCCAG                   | 644 |
| B              | ATGGTAATTCTTCTGCTGGGATCCTGGTTGATGCCATGTCCCAG                   | 644 |
| AD             | ATGGTAATTCTTCTGCTGGGATCCTGGTTGATGCCATGTCCCAG                   | 644 |
| *****          |                                                                |     |

**Figure S5.** Representative DNA sequence alignment for a segment of CDS of *STAT5A* gene (644-bp) among Barki and Aboudeleik lambs and reference sequence available in the GenBank gb|NM\_001009402.2|. B= Barki and AD= Aboudeleik. The asterisks represent the similarity.

|                |                                                               |     |
|----------------|---------------------------------------------------------------|-----|
| XR_006061143.1 | TTAAGACTGAGGGAAGTGGGTGCTGGGAGCCCCACGCCCTTCCTTGAGGGCCCGGGAAGT  | 60  |
| B              | TTAAGACTGAGGGAAGTGGGTGCTGGGAGCCCCACGCCCTTCCTTGAGGGCCCGGGAAGT  | 60  |
| AD             | TTAAGACTGAGGGAAGTGGGTGCTGGGAGCCCCACGCCCTTCCTTGAGGGCCCGGGAAGT  | 60  |
|                | *****                                                         |     |
| XR_006061143.1 | GAGCTGGGTCAAGCAGTCTCTGAGGTGGGTTTCCCCAACCAGCCAGCCAGGCAGGCAGA   | 120 |
| B              | GAGCTGGGTCAAGCAGTCTCTGAGGTGGGTTTCCCCAACCAGCCAGCCAGGCAGGCAGA   | 120 |
| AD             | GAGCTGGGTCAAGCAGTCTCTGAGGTGGGTTTCCCCAACCAGCCAGCCAGGCAGGCAGA   | 120 |
|                | *****                                                         |     |
| XR_006061143.1 | AAGGAGACGGTGTCTCAGTGAGCACTTGGCCTGTCTCCCCATGGAGCCCCCTGCTTCTA   | 180 |
| B              | AAGGAGACGGTGTCTCAGTGAGCACTTGGCCTGTCTCCCCATGGAGCCCCCTGCTTCTA   | 180 |
| AD             | AAGGAGACGGTGTCTCAGTGAGCACTTGGCCTGTCTCCCCATGGAGCCCCCTGCTTCTA   | 180 |
|                | *****                                                         |     |
| XR_006061143.1 | TGCCTTCTCTAAAACCTCCATCAGCCATCTACTTAGTATCAGATGGGGCTTGGGAAGCAG  | 240 |
| B              | TGCCTTCTCTAAAACCTCCATCAGCCATCTACTTAGTATCAGATGGGGCTTGGGAAGCAG  | 240 |
| AD             | TGCCTTCTCTAAAACCTCCATCAGCCATCTACTTAGTATCAGATGGGGCTTGGGAAGCAG  | 240 |
|                | *****                                                         |     |
| XR_006061143.1 | GCCAGGGTCAGCCTGTGGGCCAGGGGAARACCCAGGACCTGGAGAATTGAGCTGGGCCCA  | 300 |
| B              | GCCAGGGTCAGCCTGTGGGCCAGGGGAARACCCAGGACCTGGAGAATTGAGCTGGGCCCA  | 300 |
| AD             | GCCAGGGTCAGCCTGTGGGCCAGGGGAARACCCAGGACCTGGAGAATTGAGCTGGGCCCA  | 300 |
|                | *****                                                         |     |
| XR_006061143.1 | GCTTCCCATGTTTCTGATGCCCTTTGAGACGTGGCCAGGACAGGACACCAGCGGAGGGGAA | 360 |
| B              | GCTTCCCATGTTTCTGATGCCCTTTGAGACGTGGCCAGGACAGGACACCAGCGGAGGGGAA | 360 |
| AD             | GCTTCCCATGTTTCTGATGCCCTTTGAGACGTGGCCAGGACAGGACACCAGCGGAGGGGAA | 360 |
|                | *****                                                         |     |
| XR_006061143.1 | TGAAGTGTGGCCTGAGGGCAGAAGTTGCAGGGAGGAACCTGGAAGAATTGTCCTTGGTTC  | 420 |
| B              | TGAAGTGTGGCCTGAGGGCAGAAGTTGCAGGGAGGAACCTGGAAGAATTGTCCTTGGTTC  | 420 |
| AD             | TGAAGTGTGGCCTGAGGGCAGAAGTTGCAGGGAGGAACCTGGAAGAATTGTCCTTGGTTC  | 420 |
|                | *****                                                         |     |
| XR_006061143.1 | CCCTCTTACGAGACGCAAGTACTCGAGAAAGGCACCCCTGCCAGCCTGAAGAAGTTCACC  | 480 |
| B              | CCCTCTTACGAGATGCAAGTACTCGAGAAAGGCACCCCTGCCAGCCTGAAGAAGTTCACC  | 480 |
| AD             | CCCTCTTACGAGACGCAAGTACTCGAGAAAGGCACCCCTGCCAGCCTGAAGAAGTTCACC  | 480 |
|                | *****                                                         |     |
| XR_006061143.1 | TGAGGCACCTTCACAGG                                             | 496 |
| B              | TGAGGCACCTTCACAGG                                             | 496 |
| AD             | TGAGGCACCTTCACAGG                                             | 496 |
|                | *****                                                         |     |

**Figure S6.** Representative DNA sequence alignment for a segment of CDS of *TRPV1* gene (496-bp) among Barki and Aboudeleik lambs and reference sequence available in the GenBank gb|XR\_006061143.1|. B= Barki and AD= Aboudeleik. The asterisks represent the similarity.

|                |                                                              |     |
|----------------|--------------------------------------------------------------|-----|
| XM_004018854.5 | GTGCTTCGCCTTATATAAAGTGATTGGGGGCACACAGCCGTTCTCTCGAGTCACCCCCGC | 60  |
| B              | GTGCTTCGCCTTATATAAAGTGATTGGGGGCACACAGCCGTTCTCTCGAGTCACCCCCGC | 60  |
| AD             | GTGCTTCGCCTTATATAAAGTGATTGGGGGCACACAGCCGTTCTCTCGAGTCACCCCCGC | 60  |
|                | *****                                                        |     |
| XM_004018854.5 | GCAGCCTTCTTGTGGCGAGTGAGCCCGAGGAAGCCATTGCCTGCTCGGTGTTCTCTAATA | 120 |
| B              | GCAGCCTTCTTGTGGCGAGTGAGCCCGAGGAAGCCATTGCCTGCTCGGTGTTCTCTAATA | 120 |
| AD             | GCAGCCTTCTTGTGGCGAGTGAGCCCGAGGAAGCCATTGCCTGCTCGGTGTTCTCTAATA | 120 |
|                | *****                                                        |     |
| XM_004018854.5 | CCTGTGATTGTTATCCTTGAAGATGCCTGAGGAAGTGCACCATGGAGAGGAGGAGGTGGA | 180 |
| B              | CCTGTGATTGTTATCCTTGAAGATGCCTGAGGAAGTGCACCATGGAGAGGAGGAGGTGGA | 180 |
| AD             | CCTGTGATTGTTATCCTTGAAGATGCCTGAGGAAGTGCACCATGGAGAGGAGGAGGTGGA | 180 |
|                | *****                                                        |     |
| XM_004018854.5 | GACATTGCTTCCAGGCAGAAATTGCCCAACTCATGTCTCTTATTATCAACACCTTCTA   | 240 |
| B              | GACATTGCTTCCAGGCAGAAATTGCCCAACTCATGTCTCTTATTATCAATACCTTCTA   | 240 |
| AD             | GACATTGCTTCCAGGCAGAAATTGCCCAACTCATGTCTCTTATTATCAACACCTTCTA   | 240 |
|                | *****                                                        |     |
| XM_004018854.5 | TTCCAACAAGGAAATTTTCTTCGGGAGTTGATCAGTAATGCTTCTGATGCCTTGGACAA  | 300 |
| B              | TTCCAACAAGGAAATTTTCTTCGGGAGTTGATCAGTAATGCTTCTGATGCCTTGGACAA  | 300 |
| AD             | TTCCAACAAGGAAATTTTCTTCGGGAGTTGATCAGTAATGCTTCTGATGCCTTGGACAA  | 300 |
|                | *****                                                        |     |
| XM_004018854.5 | GATTGCTATGAAAGCCTGACAGACCCCTTCTAAATTGGACAGTGGTAAAGAGCTGAAAAT | 360 |
| B              | GATTGCTATGAAAGCCTGACAGACCCCTTCTAAATTGGACAGTGGTAAAGAGCTGAAAAT | 360 |
| AD             | GATTGCTATGAAAGCCTGACAGACCCCTTCTAAATTGGACAGTGGTAAAGAGCTGAAAAT | 360 |
|                | *****                                                        |     |
| XM_004018854.5 | TGACATCATCCCGAATCCCGAGGAGCGTACTCTGACTCTGGTAGACACGGGCATTGGCAT | 420 |
| B              | TGACATCATCCCGAATCCCGAGGAGCGTACTCTGACTCTGGTAGACACGGGCATTGGCAT | 420 |
| AD             | TGACATCATCCCGAATCCCGAGGAGCGTACTCTGACTCTGGTAGACACGGGCATTGGCAT | 420 |
|                | *****                                                        |     |
| XM_004018854.5 | GACCAAAGCTGATCTTGTAAATAATTGGGAACCAITGCCAAGTCTGGCACTAAAGCATT  | 480 |
| B              | GACCAAAGCTGATCTTGTAAATAATTGGGAACCAITGCCAAGTCTGGCACTAAAGCATT  | 480 |
| AD             | GACCAAAGCTGATCTTGTAAATAATTGGGAACCAITGCCAAGTCTGGCACTAAAGCATT  | 480 |
|                | *****                                                        |     |
| XM_004018854.5 | TATGGAGGCTCTTCAGGCTGGTGCAGACATCTCCATGATTGGGCAG 526           |     |
| B              | TATGGAGGCTCTTCAGGCTGGTGCAGACATCTCCATGATTGGGCAG 526           |     |
| AD             | TATGGAGGCTCTTCAGGCTGGTGCAGACATCTCCATGATTGGGCAG 526           |     |
|                | *****                                                        |     |

**Figure S7.** Representative DNA sequence alignment for a segment of CDS of *HSP90AB1* gene (526-bp) among Barki and Aboudeleik lambs and reference sequence available in the GenBank gb|XM\_004018854.5|. B= Barki and AD= Aboudeleik. The asterisks represent the similarity.

|                           |                                                                                                                                                                                                          |                   |
|---------------------------|----------------------------------------------------------------------------------------------------------------------------------------------------------------------------------------------------------|-------------------|
| XM_027977443.2<br>B<br>AD | ACTGCGGAGCCTAGGGCGACGGCAGAGCAGGATGGAGATCCCAGTGCCTGTGCAGCCGTC<br>ACTGCGGAGCCTAGGGCGACGGCAGAGCAGGATGGAGATCCCAGTGCCTGTGCAGCCGTC<br>ACTGCGGAGCCTAGGGCGACGGCAGAGCAGGATGGAGATCCCAGTGCCTGTGCAGCCGTC<br>*****    | 60<br>60<br>60    |
| XM_027977443.2<br>B<br>AD | TTGGCTGCGCCGCGCCTCGGCCCTTTGGCTGGGCTGTGGCTCCCGGGCGCCTCTTCGA<br>TTGGCTGCGCCGCGCCTCGGCCCTTTGGCTGGGCTGTGGCTCCCGGGCGCCTCTTCGA<br>TTGGCTGCGCCGCGCCTCGGCCCTTTGGCTGGGCTGTGGCTCCCGGGCGCCTCTTCGA<br>*****          | 120<br>120<br>120 |
| XM_027977443.2<br>B<br>AD | CCAGCGCTTCGGCGAGGGGCTGCTGGAGGCCGAGCTGGCTGGCTCTGGCCCTGCCGCGCT<br>CCAGCGCTTCGGCGAGGGGCTGCTGGAGGCCGAGCTGGCTGGCTCTGGCCCTGCCGCGCT<br>CCAGCGCTTCGGCGAGGGGCTGCTGGAGGCCGAGCTGGCTGGCTCTGGCCCTGCCGCGCT<br>*****    | 180<br>180<br>180 |
| XM_027977443.2<br>B<br>AD | GGCCCCCTACTACCTGCGCGCACCCAGCGTGGCGCTGCCTACCGCCCAAGGTATCTACCGA<br>GGCCCCCTACTACCTGCGCGCACCCAGCGTGGCGCTGCCTACCGCCCAAGGTATCTACCGA<br>GGCCCCCTACTACCTGCGCGCACCCAGCGTGGCGCTGCCTACCGCCCAAGGTATCTACCGA<br>***** | 240<br>240<br>240 |
| XM_027977443.2<br>B<br>AD | CCCCGGGCATTTCTCGGTGCTGCTGGATGTGAACACTTCTCACCCGAGGAAATTGCCGT<br>CCCCGGGCATTTCTCGGTGCTGCTGGATGTGAACACTTCTCACCCGAGGAAATTGCCGT<br>CCCCGGGCATTTCTCGGTGCTGCTGGATGTGAACACTTCTCACCCGAGGAAATTGCCGT<br>*****       | 300<br>300<br>300 |
| XM_027977443.2<br>B<br>AD | CAAGGTGGTTGGTGACCACGTGGAAGTTCATGCGCGTCACGAGGAGCGCCCGGATGAGCA<br>CAAGGTGGTTGGTGACCACGTGGAAGTTCATGCGCGTCACGAGGAGCGCCCGGATGAGCA<br>CAAGGTGGTTGGTGACCACGTGGAAGTTCATGCGCGTCACGAGGAGCGCCCGGATGAGCA<br>*****    | 360<br>360<br>360 |
| XM_027977443.2<br>B<br>AD | CGGATACATTGCGCGCGAGTTCCACCGCCGCTACCGCTTGGCGCTGGTGTGGACCTGTC<br>CGGATACATTGCGCGCGAGTTCCACCGCCGCTACCGCTTGGCGCTGGTGTGGACCTGTC<br>CGGATACATTGCGCGCGAGTTCCACCGCCGCTACCGCTTGGCGCTGGTGTGGACCTGTC<br>*****       | 420<br>420<br>420 |
| XM_027977443.2<br>B<br>AD | GGCCGTGACGCTCTGCGCTGTCCCTGAGGGCGTCCCTTCCATCCAGGCCGCACTTGGCC<br>GGCCGTGACGCTCTGCGCTGTCCCTGAGGGCGTCCCTTCCATCCAGGCCGCACTTGGCC<br>GGCCGTGACGCTCTGCGCTGTCCCTGAGGGCGTCCCTTCCATCCAGGCCGCACTTGGCC<br>*****       | 480<br>480<br>480 |
| XM_027977443.2<br>B<br>AD | GGCCAGGCCCCACTGCACTGCGCGCCCGGGCGGCTGCCAAGTAGGGGTGAGGGCACAC<br>GGCCAGGCCCCACTGCACTGCGCGCCCGGGCGGCTGCCAAGTAGGGGTGAGGGCACAC<br>GGCCAGGCCCCACTGCACTGCGCGCCCGGGCGGCTGCCAAGTAGGGGTGAGGGCACAC<br>*****          | 540<br>540<br>540 |
| XM_027977443.2<br>B<br>AD | CTGAACCTGGGAGCCGCTCAGCGCCCCCGCCCTTTCAAAGCCGACCTGACTCCGCCCA<br>CTGAACCTGGGAGCCGCTCAGCGCCCCCGCCCTTTCAAAGCCGACCTGACTCCGCCCA<br>CTGAACCTGGGAGCCGCTCAGCGCCCCCGCCCTTTCAAAGCCGACCTGACTCCGCCCA<br>*****          | 600<br>600<br>600 |
| XM_027977443.2<br>B<br>AD | GCCAGGTGTCCCAGCGCGCGCCAAGACTA<br>GCCAGGTGTCCCAGCGCGCGCCAAGACTA<br>GCCAGGTGTCCCAGCGCGCGCCAAGACTA<br>*****                                                                                                 | 630<br>630<br>630 |

**Figure S8.** Representative DNA sequence alignment for a segment of CDS of *HSPB6* gene (630-bp) among Barki and Aboudeleik lambs and reference sequence available in the GenBank gb|XM\_027977443.2|. B= Barki and AD= Aboudeleik. The asterisks represent the similarity.

|                           |                                                                                                                                                                                                       |                   |
|---------------------------|-------------------------------------------------------------------------------------------------------------------------------------------------------------------------------------------------------|-------------------|
| XM_027973370.2<br>B<br>AD | GGCCTCTCTTTGCGGTTGCTACCTCCTCCTCTCCCGTCTCGCCCGGTATGGATCTGCCCG<br>GGCCTCTCTTTGCGGTTGCTACCTCCTCCTCTCCCGTCTCGCCCGGTATGGATCTGCCCG<br>GGCCTCTCTTTGCGGTTGCTACCTCCTCCTCTCCCGTCTCGCCCGGTATGGATCTGCCCG<br>***** | 60<br>60<br>60    |
| XM_027973370.2<br>B<br>AD | TGGGCCCGGGCGCGCGGGGCCAGCAACGTCCCGGCCCTTCTGACCAAGCTGTGGACTC<br>TGGGCCCGGGCGCGCGGGGCCAGCAACGTCCCGGCCCTTCTGACCAAGCTGTGGACTC<br>TGGGCCCGGGCGCGCGGGGCCAGCAACGTCCCGGCCCTTCTGACCAAGCTGTGGACTC<br>*****       | 120<br>120<br>120 |
| XM_027973370.2<br>B<br>AD | TCGTGAGCGACCCGGACACGGACGCGCTCATCTGCTGGAGCCCGAGCGGGAACAGCTTCC<br>TCGTGAGCGACCCGGACACGGACGCGCTCATCTGCTGGAGCCCGAGCGGGAACAGCTTCC<br>TCGTGAGCGACCCGGACACGGACGCGCTCATCTGCTGGAGCCCGAGCGGGAACAGCTTCC<br>***** | 180<br>180<br>180 |
| XM_027973370.2<br>B<br>AD | ACGTGCTGGACACGGGCCAGTTTGCCAAGGAGGTGCTGCCCAAGTACTTCAAGCACAGCA<br>ACGTGCTGGACACGGGCCAGTTTGCCAAGGAGGTGCTGCCCAAGTACTTCAAGCACAGCA<br>ACGTGCTGGACACGGGCCAGTTTGCCAAGGAGGTGCTGCCCAAGTACTTCAAGCACAGCA<br>***** | 240<br>240<br>240 |
| XM_027973370.2<br>B<br>AD | ACATGGCTAGCTTCGTGCGGCAGCTCAACATGTATGGCTTCCGGAAGGTGGTCCACATCG<br>ACATGGCTAGCTTCGTGCGGCAGCTCAACATGTATGGCTTCCGGAAGGTGGTCCACATCG<br>ACATGGCTAGCTTCGTGCGGCAGCTCAACATGTATGGCTTCCGGAAGGTGGTCCACATCG<br>***** | 300<br>300<br>300 |
| XM_027973370.2<br>B<br>AD | AGCAGGGTGGCCTGGTCAAGCCAGAGAGGGACGACACCGAGTTCAGCACCCGTGCTTCC<br>AGCAGGGTGGCCTGGTCAAGCCAGAGAGGGACGACACCGAGTTCAGCACCCGTGCTTCC<br>AGCAGGGTGGCCTGGTCAAGCCAGAGAGGGACGACACCGAGTTCAGCACCCGTGCTTCC<br>*****    | 360<br>360<br>360 |
| XM_027973370.2<br>B<br>AD | TGCGAGGCCAGGAGCAGCTCCTCGAGAACATCAAGAGGAAAGTGACCAAGCTGTCCACTC<br>TGCGAGGCCAGGAGCAGCTCCTCGAGAACATCAAGAGGAAAGTGACCAAGCTGTCCACTC<br>TGCGAGGCCAGGAGCAGCTCCTCGAGAACATCAAGAGGAAAGTGACCAAGCTGTCCACTC<br>***** | 420<br>420<br>420 |
| XM_027973370.2<br>B<br>AD | AGCTGATGAAGGGGAAGCAGGAGAGCATGGACTCCAAGCTGCTGGCCATGAAGCATGAGA<br>AGCTGATGAAGGGGAAGCAGGAGAGCATGGACTCCAAGCTGCTGGCCATGAAGCATGAGA<br>AGCTGATGAAGGGGAAGCAGGAGAGCATGGACTCCAAGCTGCTGGCCATGAAGCATGAGA<br>***** | 480<br>480<br>480 |

**Figure S9.** Representative DNA sequence alignment for a segment of CDS of *HSF1* gene (480-bp) among Barki and Aboudeleik lambs and reference sequence available in the GenBank gb|XM\_027973370.2|. B= Barki and AD= Aboudeleik. The asterisks represent the similarity.

|                |                                                              |     |
|----------------|--------------------------------------------------------------|-----|
| XM_042238340.1 | GAATAACGGAGGCAGAGCCCTTCATTAACTGCTAAAACTCTACTGCACGAATGTGAAC   | 60  |
| B              | GAATAACGGAGGCAGAGCCCTTCATTAACTGCTAAAACTCTACTGCACGAATGTGAAC   | 60  |
| AD             | GAATAACGGAGGCAGAGCCCTTCATTAACTGCTAAAACTCTACTGCACGAATGTGAAC   | 60  |
|                | *****                                                        |     |
| XM_042238340.1 | GATCCACGCCACGGCCCTCTACCTGAGAGGTTGAGCGAGGGTGTGCGTCTCCACCGAGG  | 120 |
| B              | GATCCACGCCACGGCCCTCTACCTGAGAGGTTGAGCGAGGGTGTGCGTCTCCACCGAGG  | 120 |
| AD             | GATCCACGCCACGGCCCTCTACCTGAGAGGTTGAGCGAGGGTGTGCGTCTCCACCGAGG  | 120 |
|                | *****                                                        |     |
| XM_042238340.1 | AGATTGGCCAAGATATAATTAGAGCCTGTCTACCGAGCCCCAGCGCCTTCACCATCA    | 180 |
| B              | AGATTGGCCAAGATATAATTAGAGCCTGTCTACCGAGCCCCAGCGCCTTCACCGTCA    | 180 |
| AD             | AGATTGGCCAAGATATAATTAGAGCCTGTCTACCGAGCCCCAGCGCCTTCACCATCA    | 180 |
|                | *****                                                        |     |
| XM_042238340.1 | CGCGGGATTGGGGACACCCAGAACCCAAATATTGGGACTCAGGGACGGGCCAGGGTGCGC | 240 |
| B              | CGCGGGATTGGGGACACCCAGAACCCAAATATTGGGACTCAGGGACGGGCCAGGGTGCGC | 240 |
| AD             | CGCGGGATTGGGGACACCCAGAACCCAAATATTGGGACTCAGGGACGGGCCAGGGTGCGC | 240 |
|                | *****                                                        |     |
| XM_042238340.1 | TCCCGAGGCCGATCCAAACGGTCACCCCACTGGCTGGGACCCCTGACACTCCGGCGAAGG | 300 |
| B              | TCCCGAGGCCGATCCAAACGGTCACCCCACTGGCTGGGACCCCTGACACTCCGGCGAAGG | 300 |
| AD             | TCCCGAGGCCGATCCAAACGGTCACCCCACTGGCTGGGACCCCTGACACTCCGGCGAAGG | 300 |
|                | *****                                                        |     |
| XM_042238340.1 | ACCAAGACTCAATGCCGCGGAGAGAAGCGAACTGCTTCAGACTGACTCGCCGACACCA   | 360 |
| B              | ACCAAGACTCAATGCCGCGGAGAGAAGCGAACTGCTTCAGACTGACTCGCCGACACCA   | 360 |
| AD             | ACCAAGACTCAATGCCGCGGAGAGAAGCGAACTGCTTCAGACTGACTCGCCGACACCA   | 360 |
|                | *****                                                        |     |
| XM_042238340.1 | ACGGAAGAAGCGGCCCGGGCGGACCCACCAAACCCACACCTCAGAAACCACTGCAG     | 420 |
| B              | ACGGAAGAAGCGGCCCGGGCGGACCCACCAAACCCACACCTCAGAAACCACTGCAG     | 420 |
| AD             | ACGGAAGAAGCGGCCCGGGCGGACCCACCAAACCCACACCTCAGAAACCACTGCAG     | 420 |
|                | *****                                                        |     |
| XM_042238340.1 | AGGGTGTCTGTGGCCTCGGACTCCCATAGCCACCGATGCTGTAAAAAGCCTACCCGTCT  | 480 |
| B              | AGGGTGTCTGTGGCCTCGGACTCCCATAGCCACCGATGCTGTAAAAAGCCTACCCGTCT  | 480 |
| AD             | AGGGTGTCTGTGGCCTCGGACTCCCATAGCCACCGATGCTGTAAAAAGCCTACCCGTCT  | 480 |
|                | *****                                                        |     |
| XM_042238340.1 | CTTTGAAGGGCAGCAATTTAAACCTACCAGAGCAAGTGTCTGCAACCAACCGACCAATTG | 540 |
| B              | CTTTGAAGGGCAGCAATTTAAACCTACCAGAGCAAGTGTCTGCAACCAACCGACCAATTG | 540 |
| AD             | CTTTGAAGGGTAGCAATTTAAACCTACCAGAGCAAGTGTCTGCAACCAACCGACCAATTG | 540 |
|                | *****                                                        |     |

**Figure S10.** Representative DNA sequence alignment for a segment of CDS of *ST1P1* gene (540-bp) among Barki and Aboudeleik lambs and reference sequence available in the GenBank gb|XM\_042238340.1|. B= Barki and AD= Aboudeleik. The asterisks represent the similarity.

```

KP325220.1    CCTGCGTGGTGCATGGAAGTGATCTGAAGGACATGACTCCCGAGCAACTGGATGACATT 60
B             CCTGCGTGGTGCATGGAAGTGATCTGAAGGACATGACTCCCGAGCAACTGGATGACATT 60
AD            CCTGCGTGGTGCATGGAAGTGATCTGAAGGACATGACTCCCGAGCAGCTGGATGACATT 60
*****

KP325220.1    TGAAGTACCACACGGAGATTGTGTTGCCAGGACCTCTCCGAGCAGAAGCTCATCATT 120
B             TGAAGTACCACACGGAGATTGTGTTGCCAGGACCTCTCCGAGCAGAAGCTCATCATT 120
AD            TGAAGTACCACACGGAGATTGTGTTGCCAGGACCTCTCCGAGCAGAAGCTCATCATT 120
*****

KP325220.1    TGAAGGCTGCCAGAGACAGGTCGGCACACAGCTGGGGCGGGCTCTTTCAGACGCTGCTG 180
B             TGAAGGCTGCCAGAGACAGGTCGGCACACAGCTGGGGCGGGCTCTTTCAGACGCTGCTG 180
AD            TGAAGGCTGCCAGAGACAGGTCGGCACACAGCTGGGGCGGGCTCTTTCAGACGCTGCTG 180
*****

KP325220.1    GCCTGGCCTCAGTGTAGACAAAAAGCAAGGCAACAGTGTGAAACCTGAGCCAGCTAGC 240
B             GCCTGGCCTCAGTGTAGACAAAAAGCAAGGCAACAGTGTGAAACCTGAGCCAGCTAGC 240
AD            GCCTGGCCTCAGTGTAGACAAAAAGCAAGGCAACAGTGTGAAACCTGAGCCAGCTAGC 240
*****

KP325220.1    GCCTCTCTGTCTCAGTACACATGGGCCAGTAAGAAGCTCCAGGCGTAGAGGATGGTGAC 299
B             GCCTCTCTGTCTCAGTACACATGGGCCAGTAAGAAGCTCCAGGCGTAGAGGATGGTGAC 299
AD            GCCTCTCTGTCTCAGTACACATGGGCCAGTAAGAAGCTCCAGGCGTAGAGGATGGTGAC 299
*****

```

**Figure S11.** Representative DNA sequence alignment for a segment of CDS of *ATP1A1* gene (299-bp) among Barki and Aboudeleik lambs and reference sequence available in the GenBank gb|KP325220.1|. B= Barki and AD= Aboudeleik. The asterisks represent the similarity.

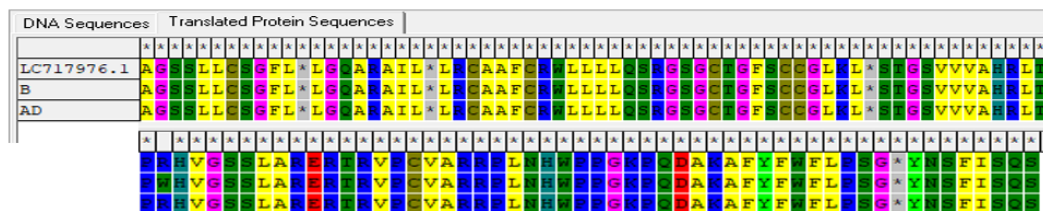

**Figure S12.** Representative amino acid sequence alignment of *CAST* gene (354-bp) among Barki and Aboudeleik lambs and reference sequence available in the GenBank gb|LC717976.1|. B= Barki and AD= Aboudeleik. The asterisks represent the similarity.

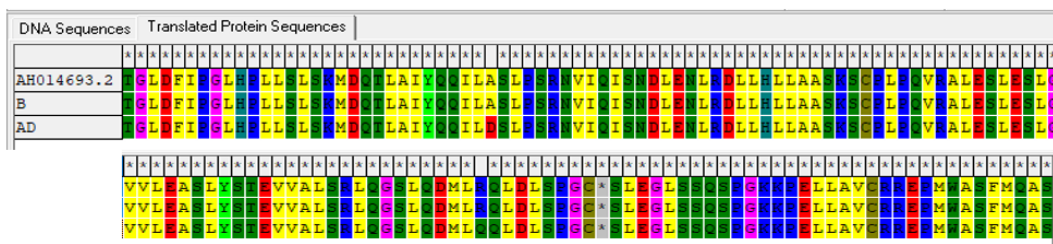

**Figure S13.** Representative amino acid sequence alignment of *LEP* gene (432-bp) among Barki and Aboudeleik lambs and reference sequence available in the GenBank gb|AH014693.2|. B= Barki and AD= Aboudeleik. The asterisks represent the similarity.



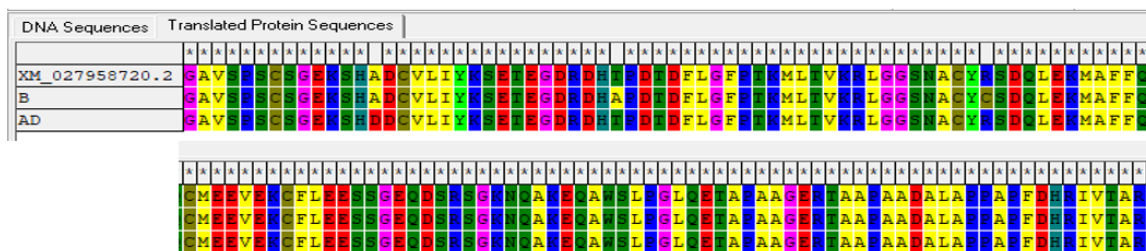

**Figure S14.** Representative amino acid sequence alignment of *MYLK4* gene (416-bp) among Barki and Aboudeleik lambs and reference sequence available in the GenBank gb|XM\_027958720.2|. B= Barki and AD= Aboudeleik. The asterisks represent the similarity.

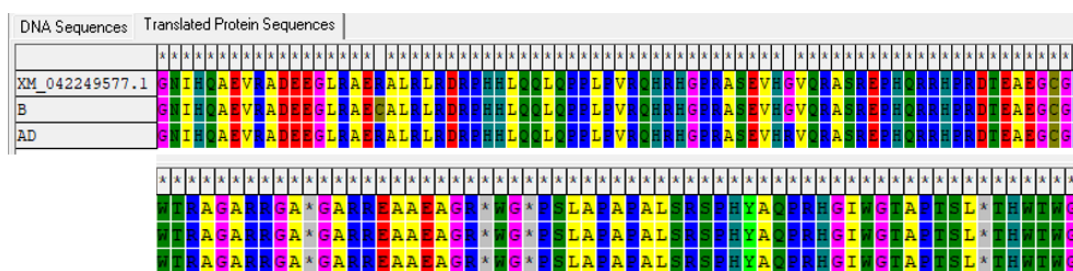

**Figure S15.** Representative amino acid sequence alignment of *MEF2B* gene (424-bp) among Barki and Aboudeleik lambs and reference sequence available in the GenBank gb|XM\_042249577.1|. B= Barki and AD= Aboudeleik. The asterisks represent the similarity.

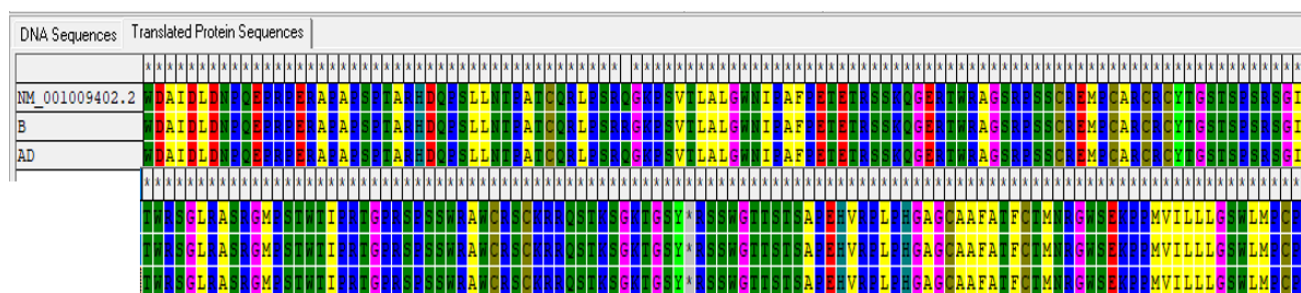

**Figure S16.** Representative amino acid sequence alignment of *STAT5A* gene (644-bp) among Barki and Aboudeleik lambs and reference sequence available in the GenBank gb|NM\_001009402.2|. B= Barki and AD= Aboudeleik. The asterisks represent the similarity.

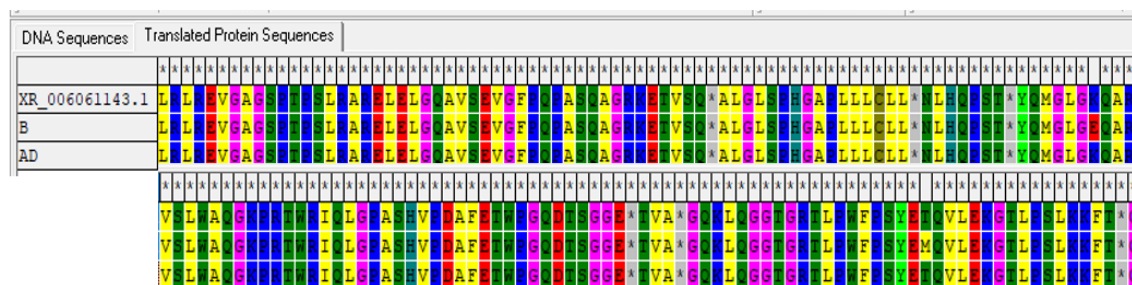

**Figure S17.** Representative amino acid sequence alignment of *TRPV1* gene (496-bp) among Barki and Aboudeleik lambs and reference sequence available in the GenBank gb|XR\_006061143.1|. B= Barki and AD= Aboudeleik. The asterisks represent the similarity.

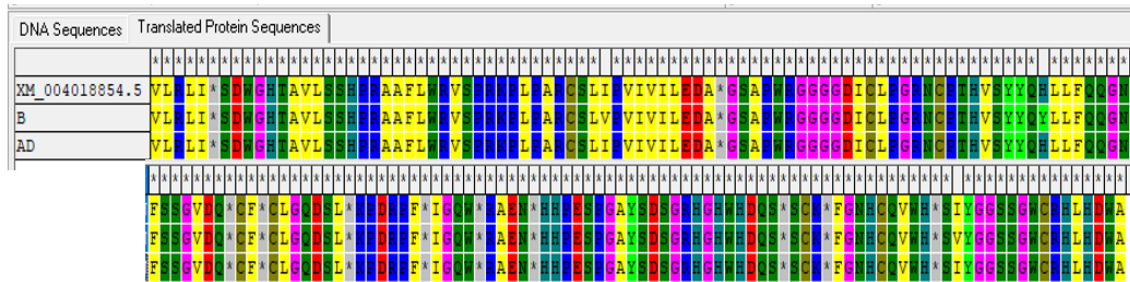

**Figure S18.** Representative amino acid sequence alignment of *HSP90AB1* gene (526-bp) among Barki and Aboudeleik lambs and reference sequence available in the GenBank gb|XM\_004018854.5|. B= Barki and AD= Aboudeleik. The asterisks represent the similarity.

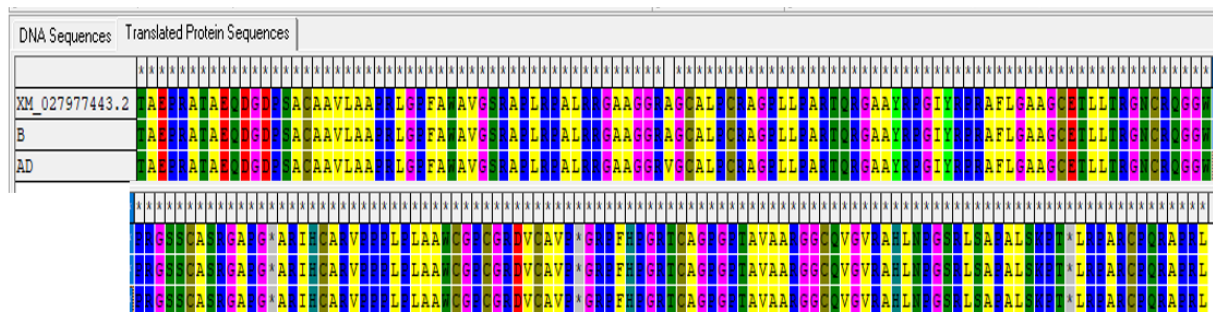

**Figure S19.** Representative amino acid sequence alignment of *HSPB6* gene (630-bp) among Barki and Aboudeleik lambs and reference sequence available in the GenBank gb|XM\_027977443.2|. B= Barki and AD= Aboudeleik. The asterisks represent the similarity.

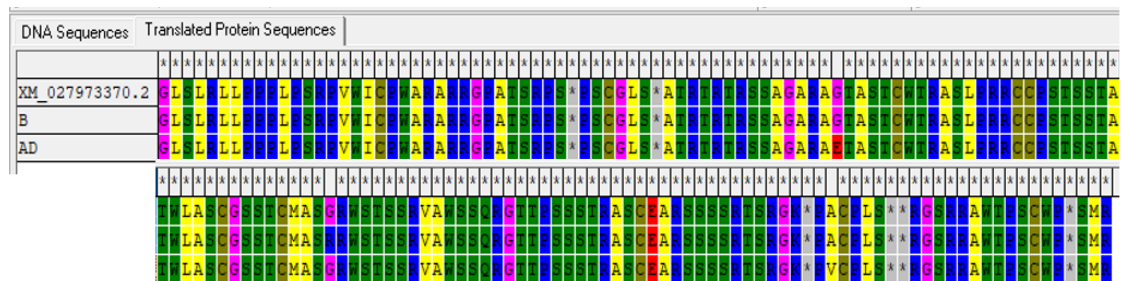

**Figure S20.** Representative amino acid sequence alignment of *HSF1* gene (480-bp) among Barki and Aboudeleik lambs and reference sequence available in the GenBank gb|XM\_027973370.2|. B= Barki and AD= Aboudeleik. The asterisks represent the similarity.

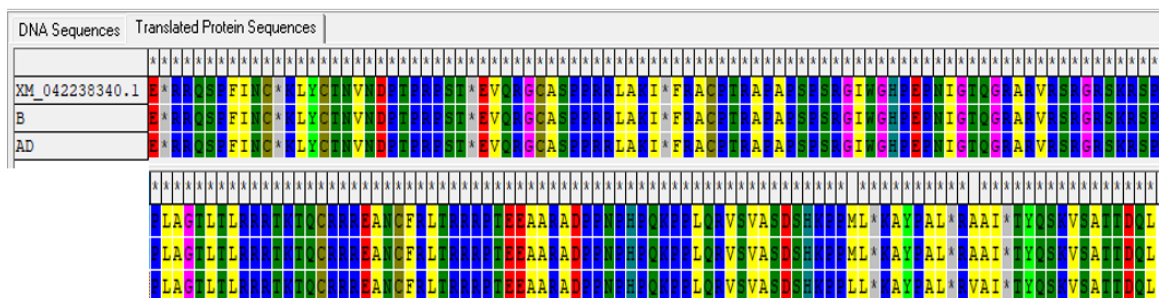

**Figure S21.** Representative amino acid sequence alignment of *ST1P1* gene (540-bp) among Barki and Aboudeleik lambs and reference sequence available in the GenBank gb|XM\_042238340.1|. B= Barki and AD= Aboudeleik. The asterisks represent the similarity.

| DNA Sequences |   |   |   |   |   |   |   |   |   | Translated Protein Sequences |   |   |   |   |   |   |   |   |   |   |   |   |   |   |   |   |   |   |   |
|---------------|---|---|---|---|---|---|---|---|---|------------------------------|---|---|---|---|---|---|---|---|---|---|---|---|---|---|---|---|---|---|---|
| KP325220.1    | A | G | M | V | I | * | * | * | * | L                            | M | F | * | * | * | * | * | * | * | * | * | * | * | * | * | * | * | * | * |
| B             | A | G | M | V | I | * | * | * | * | L                            | M | F | * | * | * | * | * | * | * | * | * | * | * | * | * | * | * | * | * |
| AD            | A | G | M | V | I | * | * | * | * | L                            | M | F | * | * | * | * | * | * | * | * | * | * | * | * | * | * | * | * | * |

**Figure S22.** Representative amino acid sequence alignment of *ATP1A1* gene (299-bp) among Barki and Aboudeleik lambs and reference sequence available in the GenBank gb|KP325220.1|. B= Barki and AD= Aboudeleik. The asterisks represent the similarity.
